# Supplementary material for: High Cell Selectivity and Bactericidal Mechanism of Symmetric Peptides Centered on d-Pro–Gly Pairs
Source: PubMed Central journal article supplement (PMC7037546; doi:10.3390/ijms21031140), 2020-02-08
Supplement: ijms-21-01140-s001.pdf [file ijms-21-01140-s001.pdf]

## Supplementary Materials

### Title:

High Cell Selectivity and Bactericidal Mechanism of Symmetric Peptides Centered on D-Pro-Gly Pairs

### Authors:

Bo-yan Jia, Yi-ming Wang, Ying Zhang, Zi Wang, Xue Wang, Inam Muhammad, Ling-cong Kong, Zhi-hua Pei, Hong-xia Ma \* and Xiu-yun Jiang \*

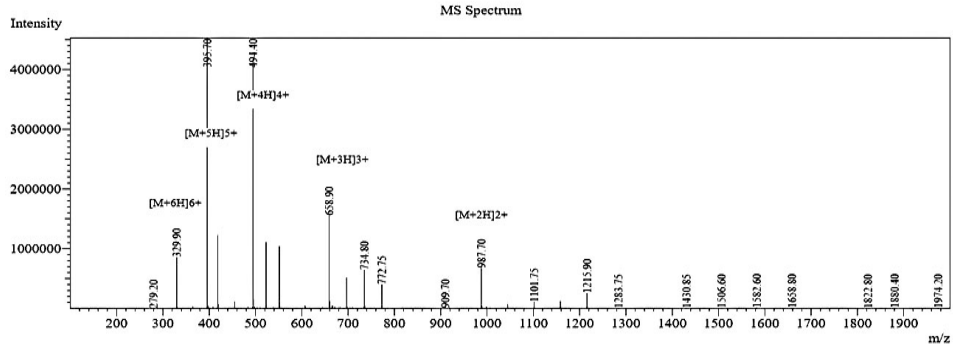

(a)

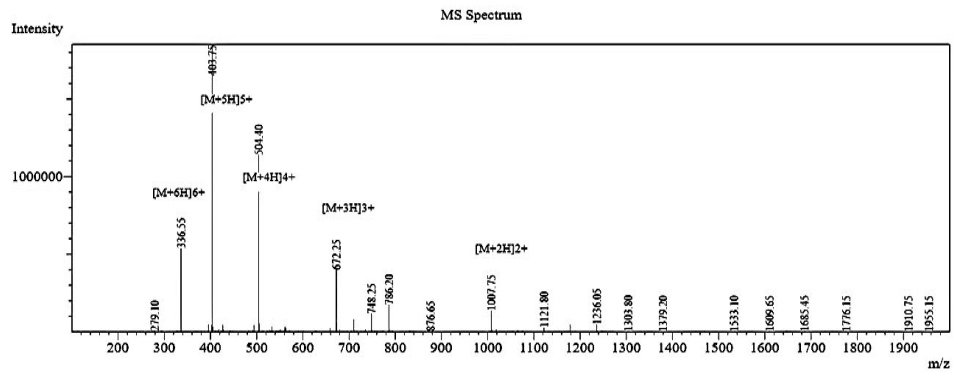

(b)

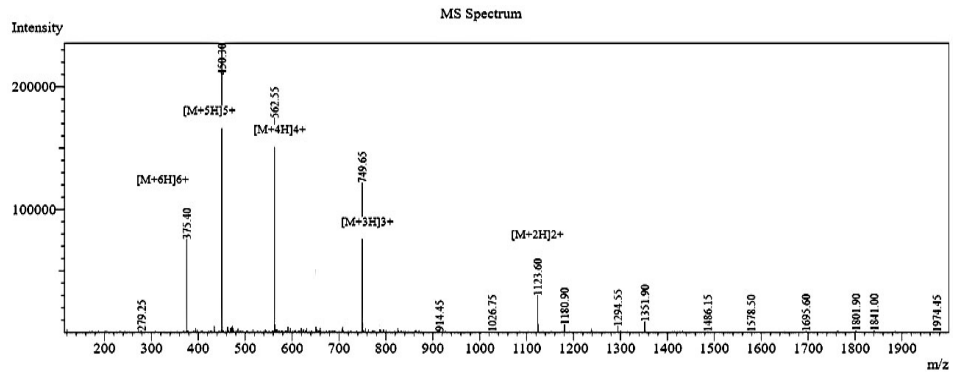

(c)

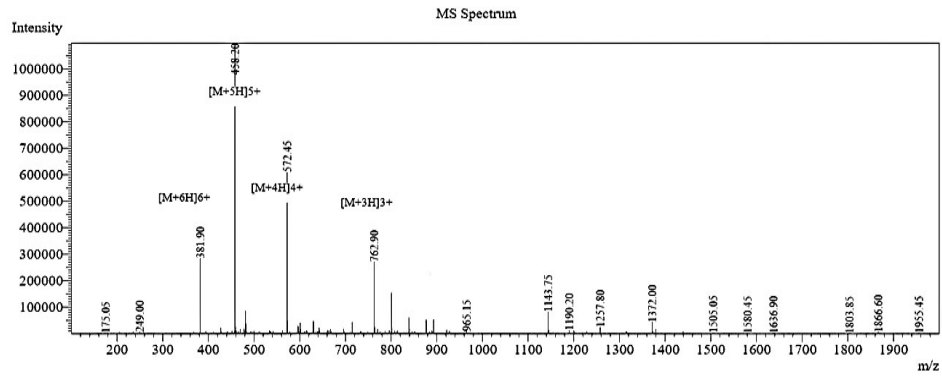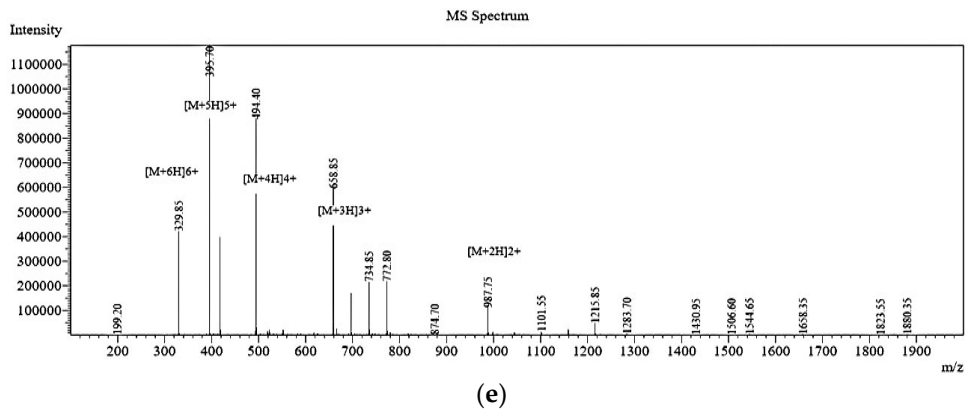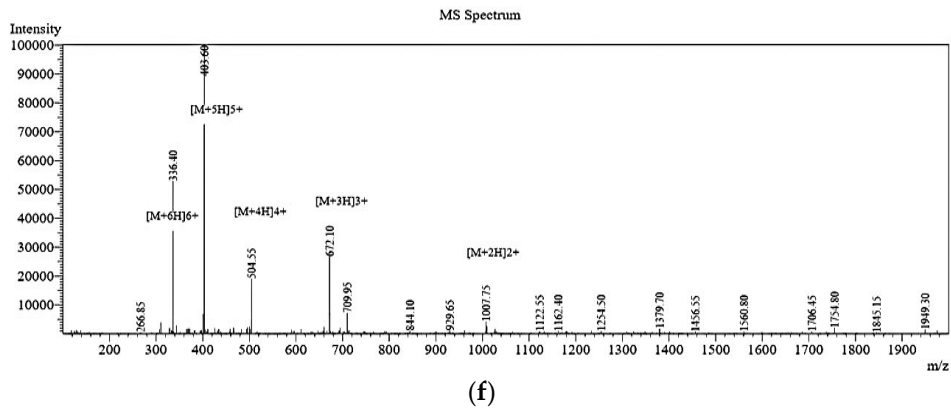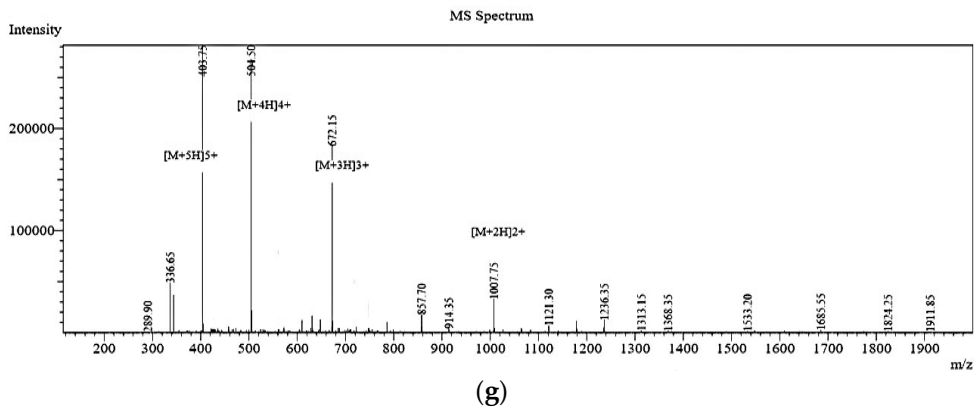

Figure S1. The MALDI-TOF MS of IR<sub>GG</sub> (a), IR<sub>PG</sub> (b), FR<sub>GG</sub> (c), FR<sub>PG</sub> (d), LR<sub>GG</sub> (e), LR<sub>PG</sub> (f) and LR<sub>α</sub> (g).

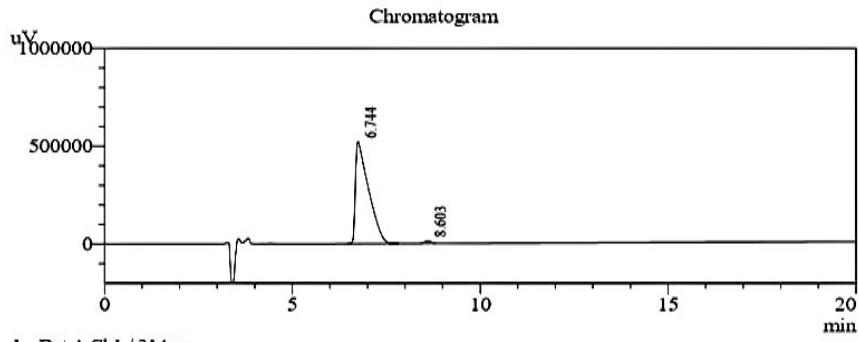

PeakTable

| Peak# | Ret. Time | Area     | Height | Area %  | Height % |
|-------|-----------|----------|--------|---------|----------|
| 1     | 6.744     | 12625051 | 521779 | 98.943  | 97.631   |
| 2     | 8.603     | 134844   | 12662  | 1.057   | 2.369    |
| Total |           | 12759894 | 534441 | 100.000 | 100.000  |

(a)

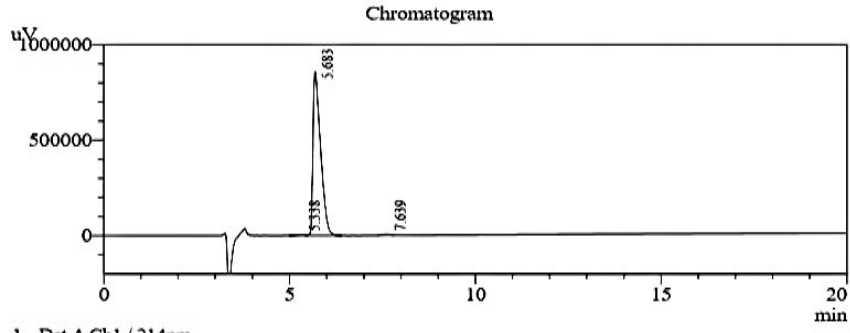

PeakTable

| Peak# | Ret. Time | Area     | Height | Area %  | Height % |
|-------|-----------|----------|--------|---------|----------|
| 1     | 5.338     | 71453    | 5384   | 0.577   | 0.620    |
| 2     | 5.683     | 12251155 | 859064 | 98.848  | 98.867   |
| 3     | 7.639     | 71307    | 4461   | 0.575   | 0.513    |
| Total |           | 12393915 | 868909 | 100.000 | 100.000  |

(b)

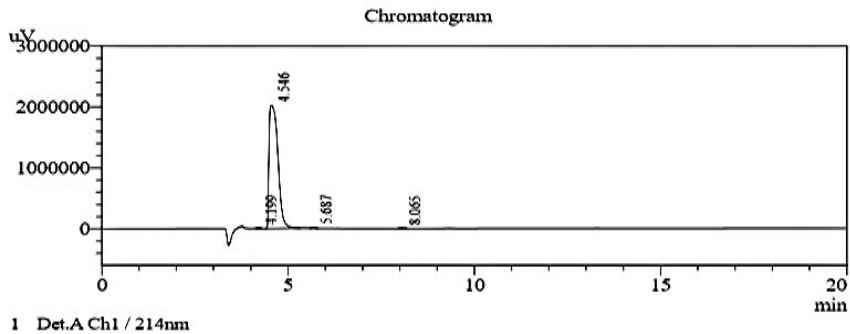

PeakTable

| Peak# | Ret. Time | Area     | Height  | Area %  | Height % |
|-------|-----------|----------|---------|---------|----------|
| 1     | 4.199     | 86181    | 17176   | 0.256   | 0.833    |
| 2     | 4.546     | 33441691 | 2025416 | 99.356  | 98.225   |
| 3     | 5.687     | 87508    | 13702   | 0.260   | 0.664    |
| 4     | 8.065     | 43064    | 5715    | 0.128   | 0.277    |
| Total |           | 33658444 | 2062009 | 100.000 | 100.000  |

(c)

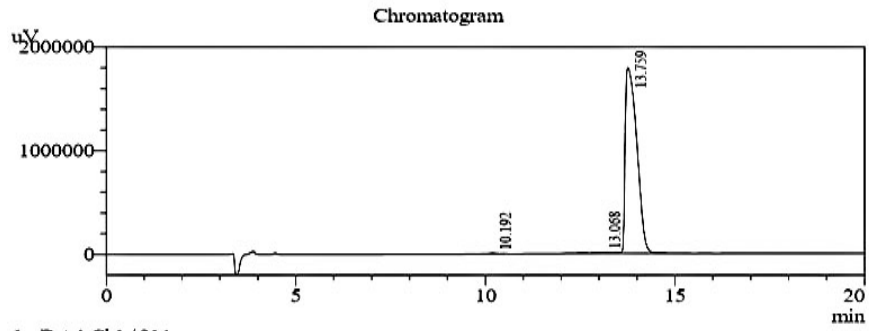

**PeakTable**

Detector A Ch1 214nm

| Peak# | Ret. Time | Area     | Height  | Area %  | Height % |
|-------|-----------|----------|---------|---------|----------|
| 1     | 10.192    | 73083    | 7429    | 0.190   | 0.411    |
| 2     | 13.068    | 237994   | 10652   | 0.618   | 0.589    |
| 3     | 13.759    | 38185101 | 1790524 | 99.192  | 99.000   |
| Total |           | 38496177 | 1808605 | 100.000 | 100.000  |

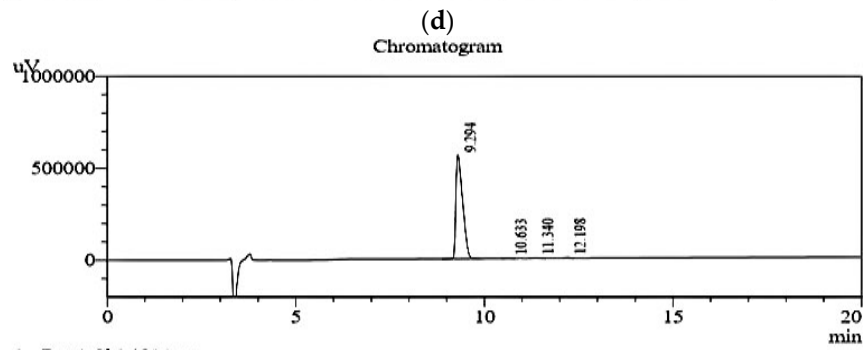

**PeakTable**

Detector A Ch1 214nm

| Peak# | Ret. Time | Area    | Height | Area %  | Height % |
|-------|-----------|---------|--------|---------|----------|
| 1     | 9.294     | 7005832 | 564679 | 99.045  | 98.718   |
| 2     | 10.633    | 15032   | 1699   | 0.213   | 0.297    |
| 3     | 11.340    | 32329   | 2858   | 0.457   | 0.500    |
| 4     | 12.198    | 20208   | 2777   | 0.286   | 0.485    |
| Total |           | 7073400 | 572014 | 100.000 | 100.000  |

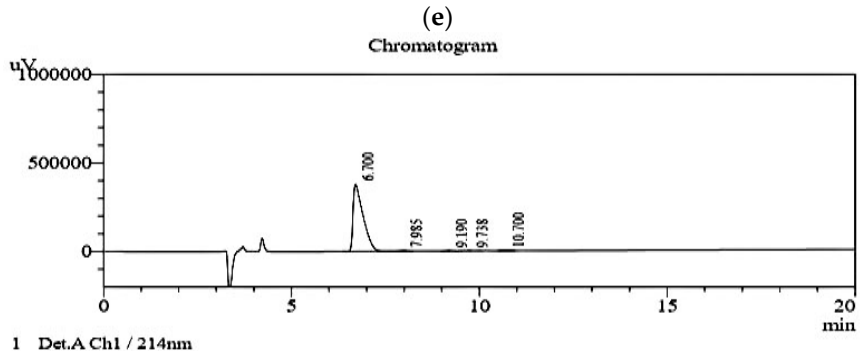

**PeakTable**

Detector A Ch1 214nm

| Peak# | Ret. Time | Area    | Height | Area %  | Height % |
|-------|-----------|---------|--------|---------|----------|
| 1     | 6.700     | 7041113 | 380803 | 98.610  | 98.042   |
| 2     | 7.985     | 50078   | 3450   | 0.701   | 0.888    |
| 3     | 9.190     | 16651   | 1769   | 0.233   | 0.455    |
| 4     | 9.738     | 14363   | 1209   | 0.201   | 0.311    |
| 5     | 10.700    | 18128   | 1175   | 0.254   | 0.303    |
| Total |           | 7140334 | 388406 | 100.000 | 100.000  |

**(f)**

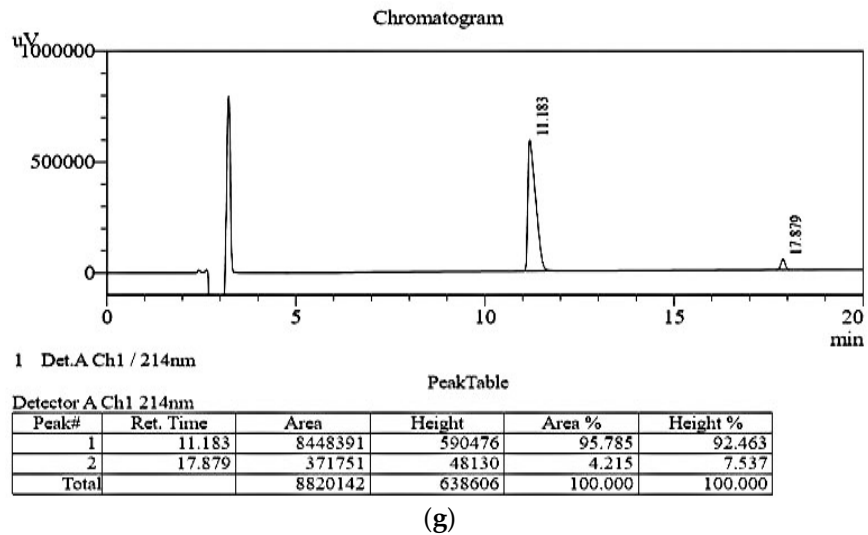

**Figure S2.** The HPLC spectra of IR<sub>GG</sub> (a), IR<sub>pG</sub> (b), FR<sub>GG</sub> (c), FR<sub>pG</sub> (d), LR<sub>GG</sub> (e), LR<sub>pG</sub> (f) and LR $\alpha$  (g).

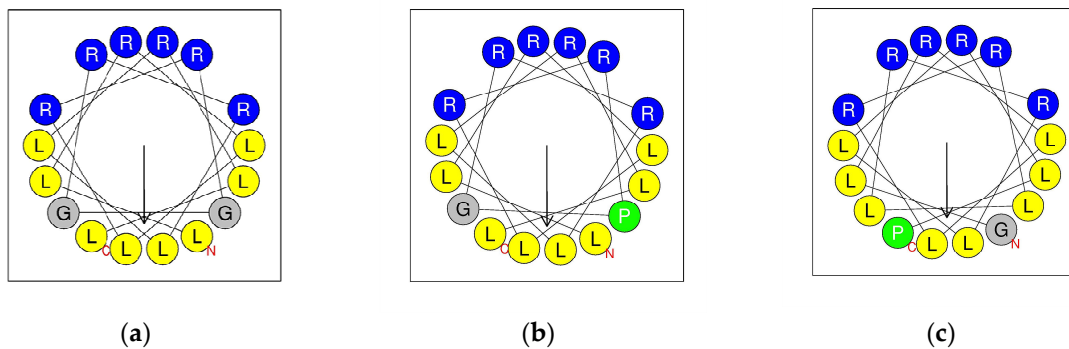

**Figure S3.** The helical wheel projections of LR<sub>GG</sub> (a), LR<sub>pG</sub> (b) and LR $\alpha$  (c). The blue represents positively charged residues. The yellow represents hydrophobicity residues. The gray and green represent glycine and proline, respectively.

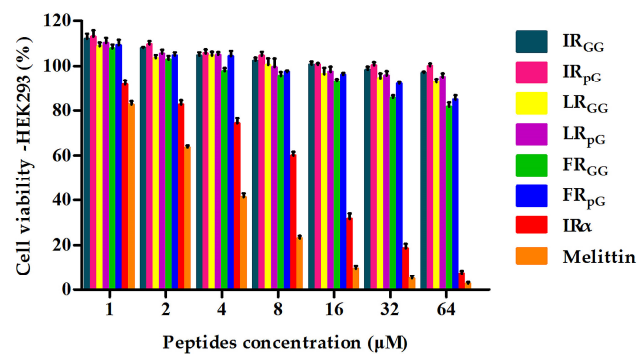

**Figure S4.** Cytotoxicity of the designed peptides against HEK293T cells.
